# Supplementary figures and images for: Disperse and disordered: a mexylaminotriazine-substituted azobenzene derivative with superior glass and surface relief grating formation
Source: Royal Society of Chemistry journal article supplement (doi:10.1039/c3tc32034k), 2013-12-03

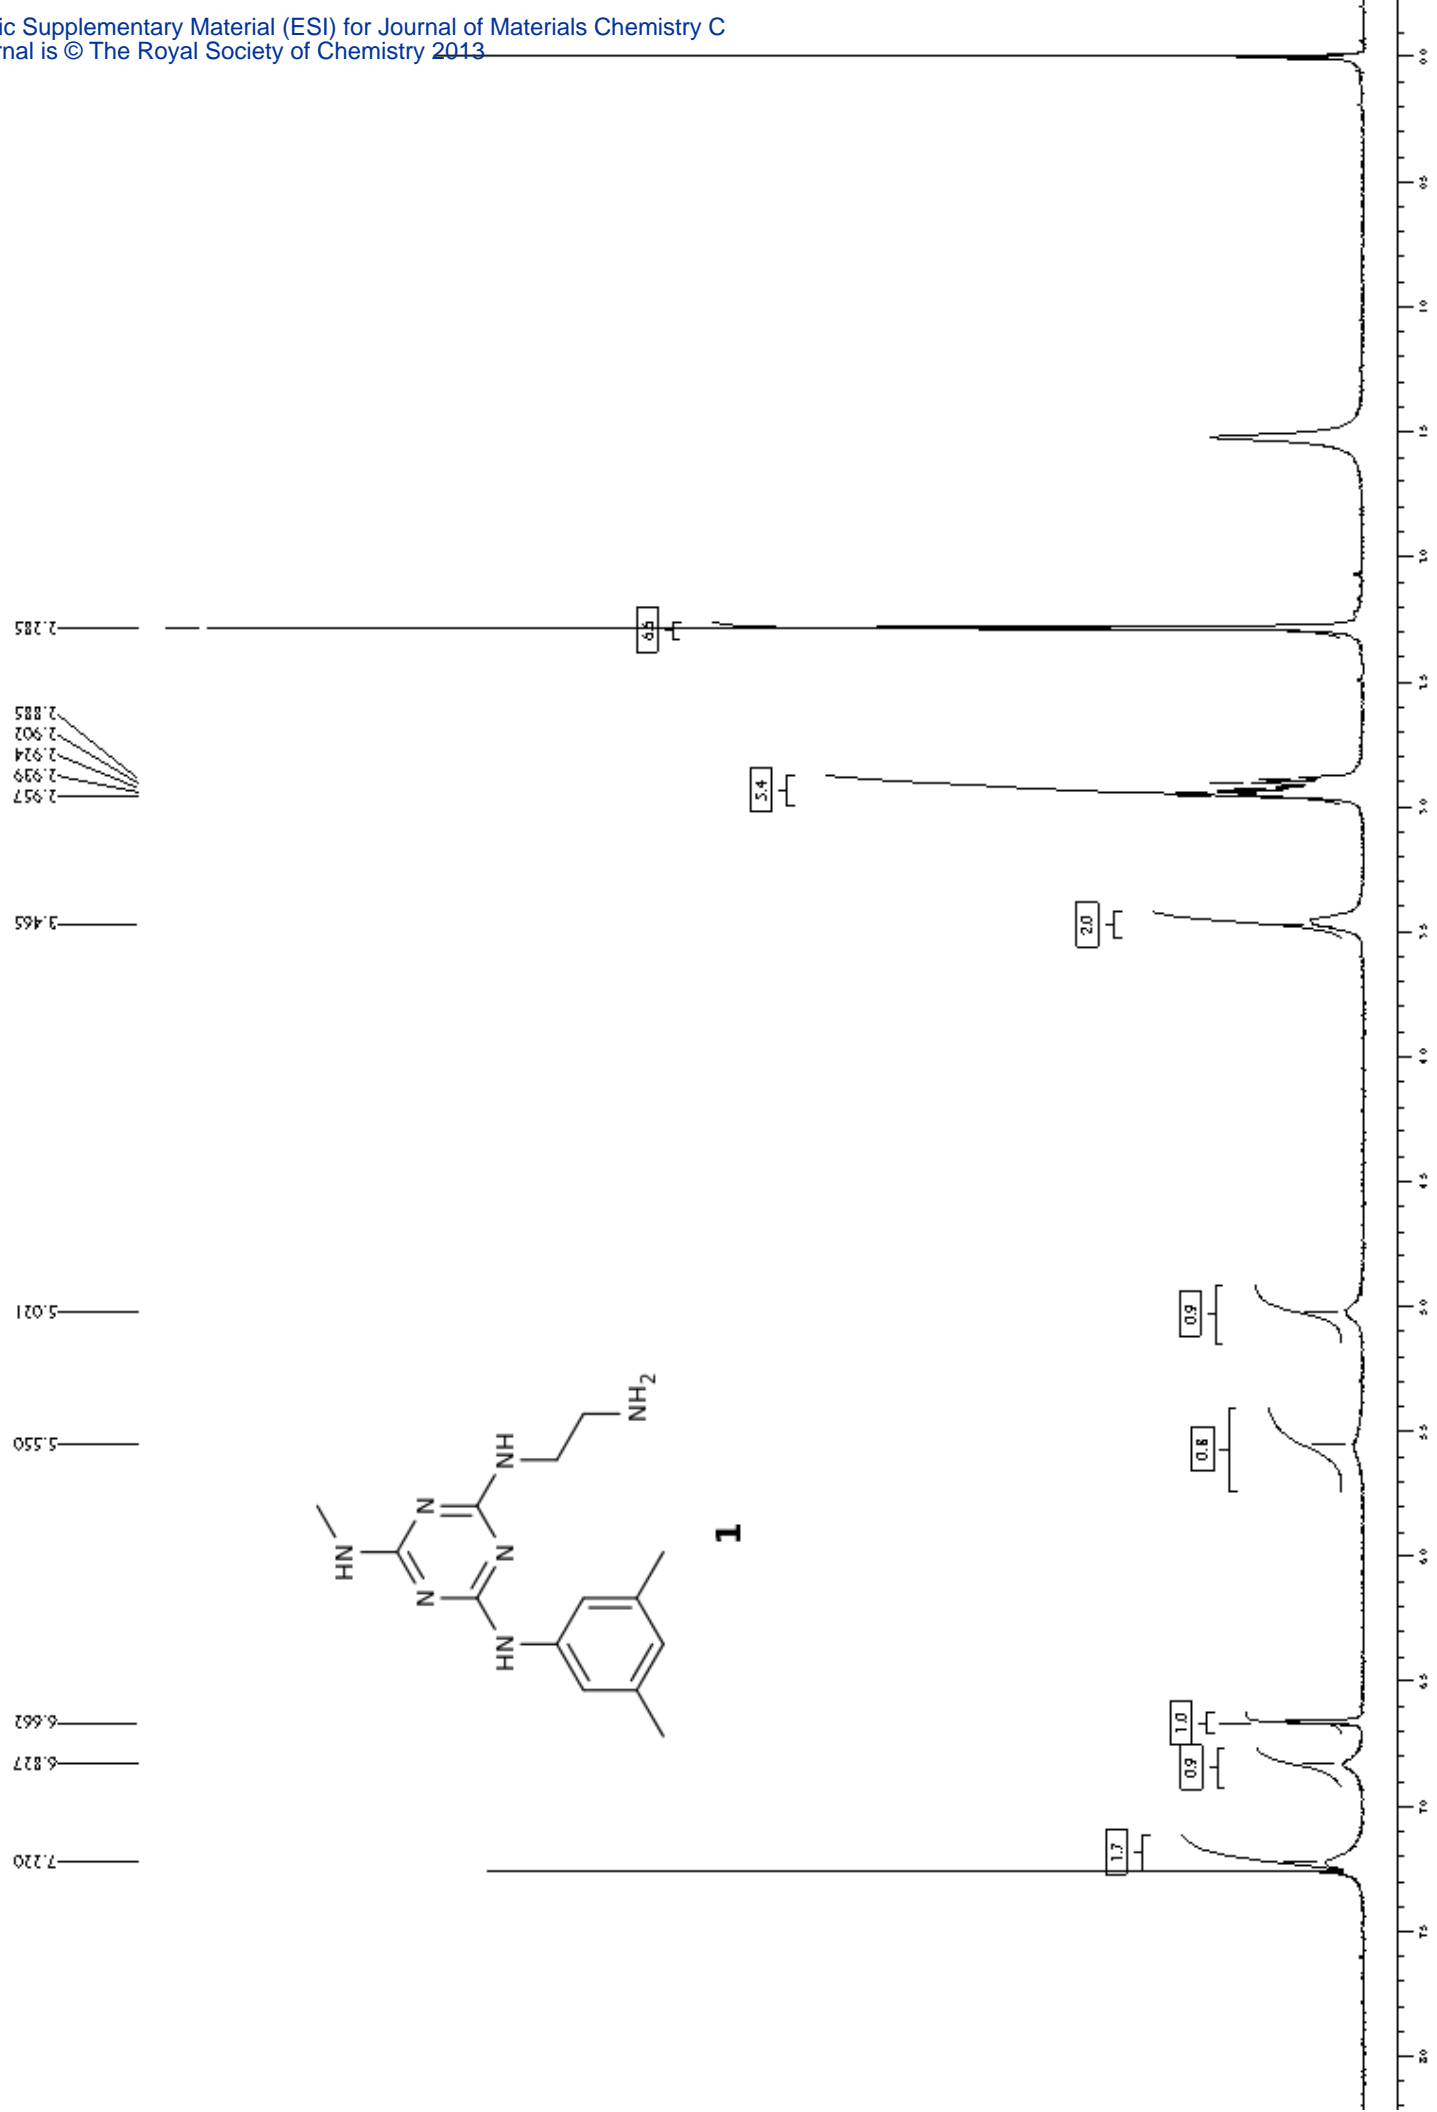

43.440  
41.480  
27.441  
21.391

139.238  
138.141  
124.178  
117.860

166.20  
166.18  
164.265

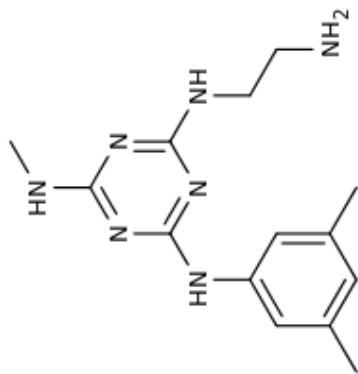

**1**

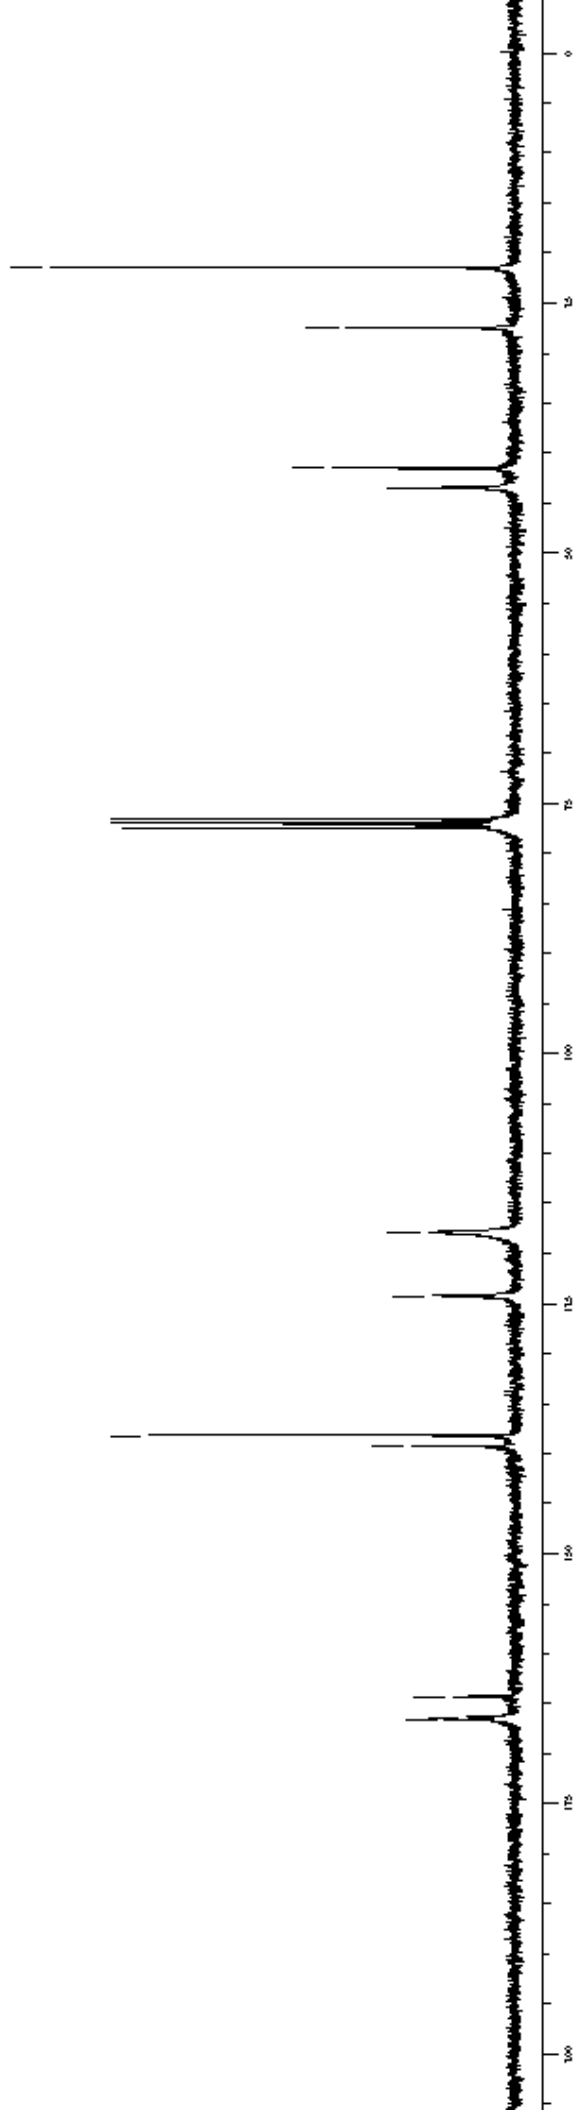

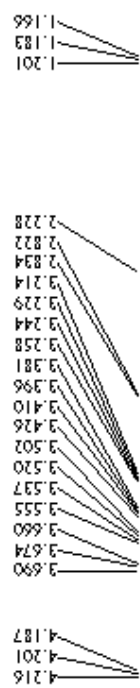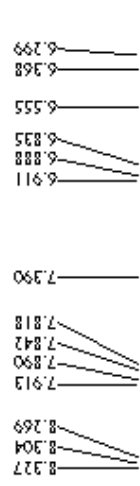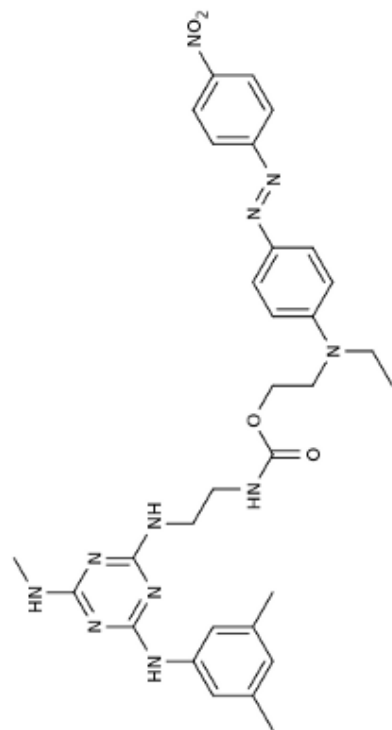

2

363 K

3.0

2.9

2.1  
2.1  
2.1  
2.1  
2.1

2.1

2.0  
0.9  
1.0  
1.0  
1.0  
1.0

2.0

2.1  
2.1  
2.1

2.1  
0.9

11.899  
21.164  
27.153  
40.385  
45.034  
48.718  
61.051

111.481  
117.135  
122.387  
122.605  
124.830  
126.049  
136.920  
140.513  
142.744  
146.727  
151.528  
156.128  
163.881  
166.113

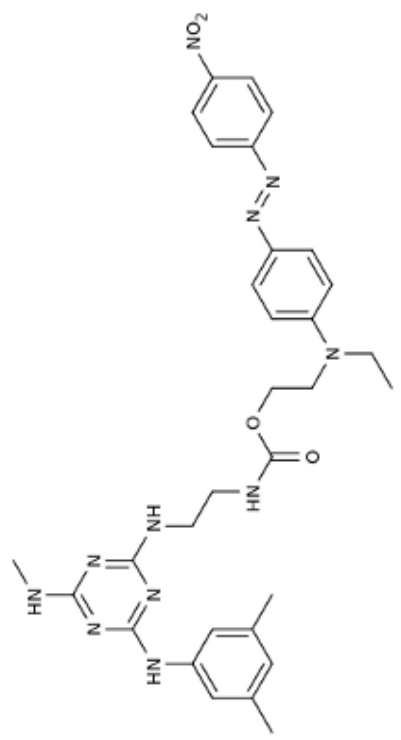

2

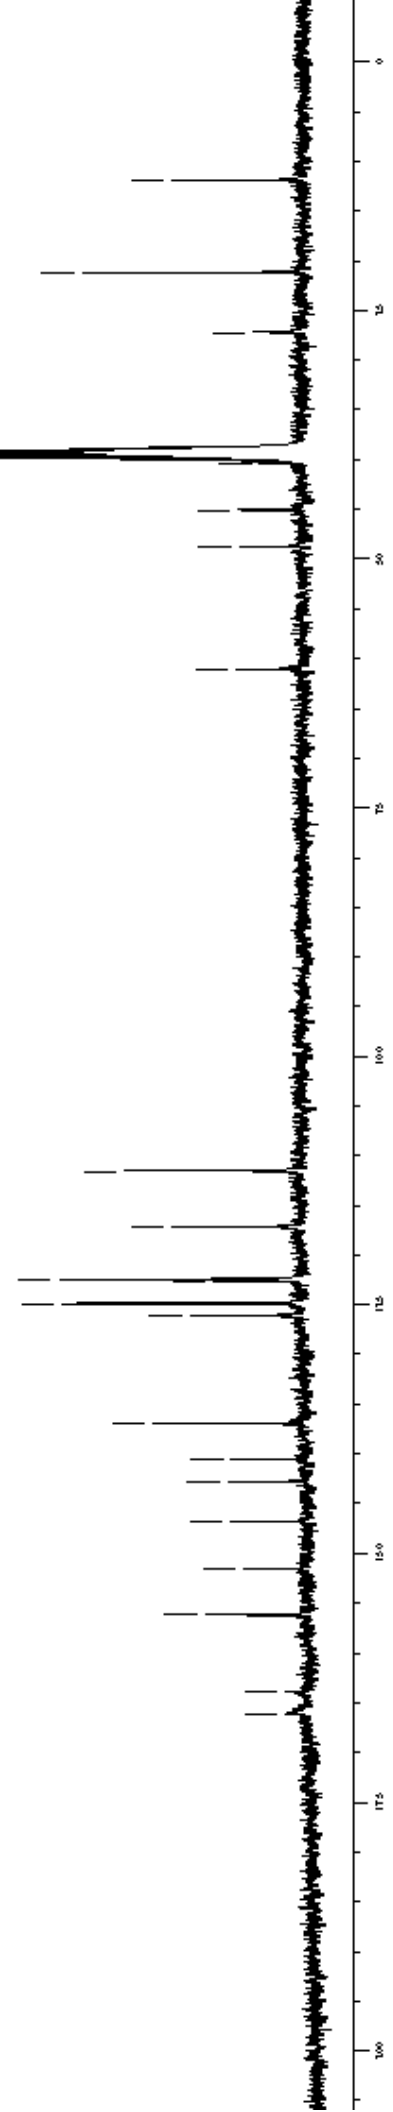

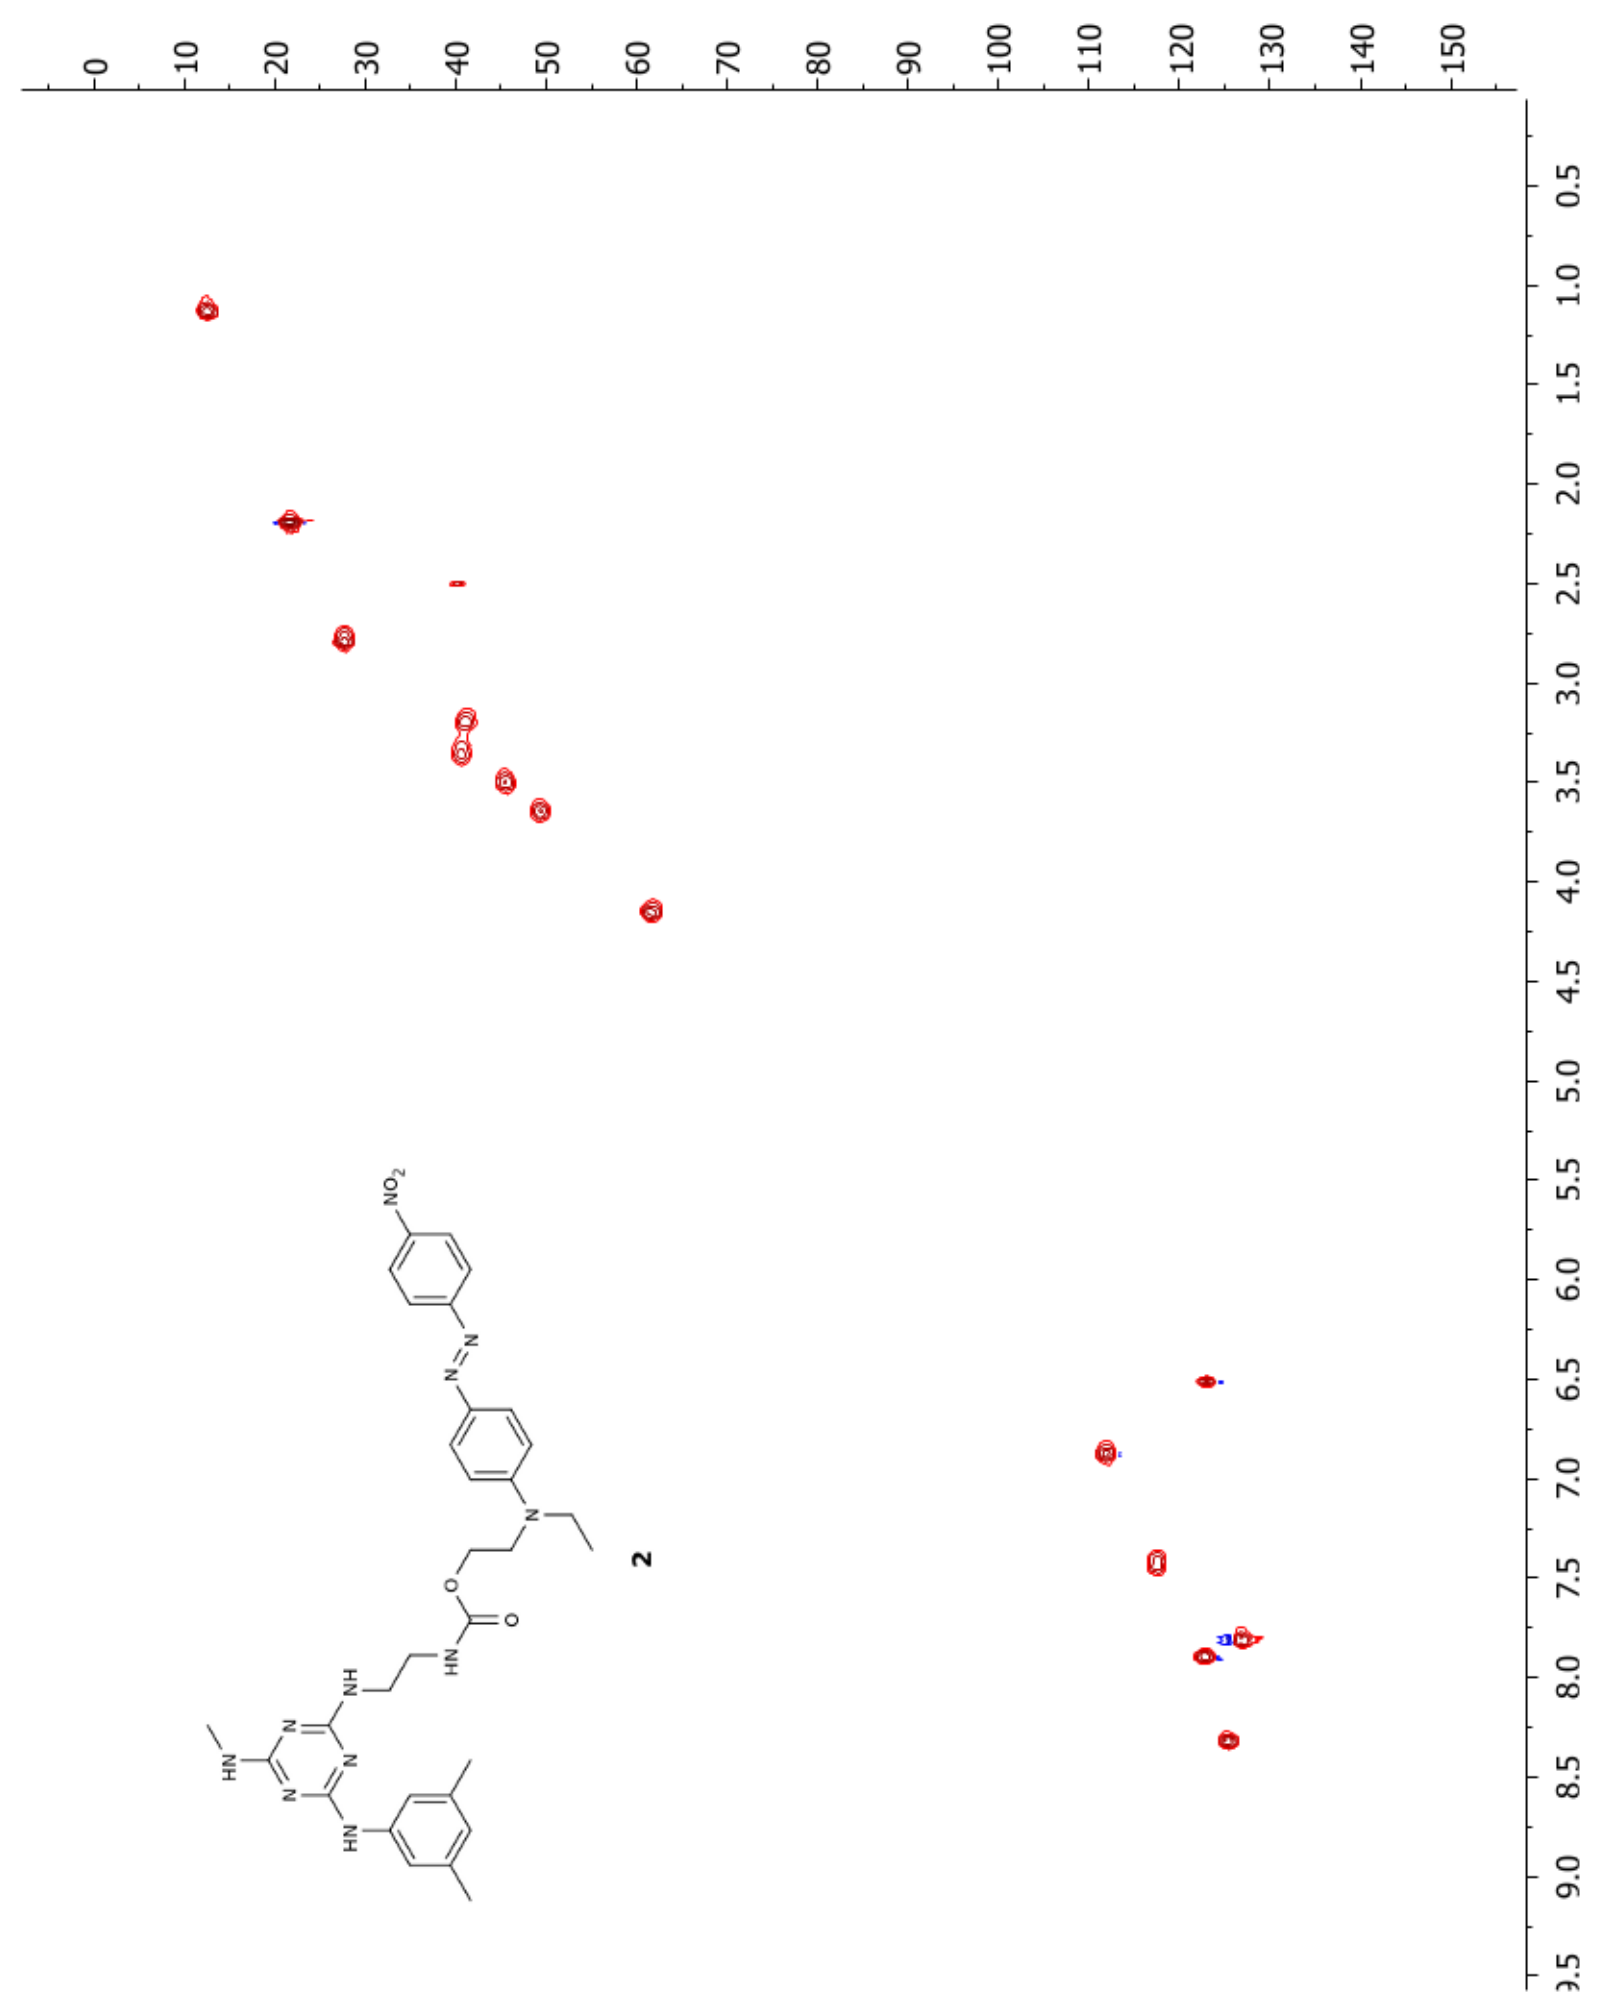

Supplement: c3tc32034k.pdf [file c3tc32034k.pdf]
